# Supplementary material for: Motivators and deterrents for early career female doctors applying to surgical training programmes in the UK National Health Service: a mixed-methods study
Source: HighWire-hosted journal article supplement (doi:10.1136/bmjopen-2021-055652), 2022-12-01
Supplement: bmjopen-2021-055652supp002_data_supplement.pdf [file bmjopen-2021-055652supp002_data_supplement.pdf]

## Appendix B

### Gender Impact Rating (GIR) and Rankings data

| Stage of Training | Median Gender Impact Rating |
|-------------------|-----------------------------|
| FY2               | 3                           |
| CT1               | 3                           |
| CT2               | 2                           |

Table 1.1. Gender Impact Rating (GIR) at foundation year 2 (FY2), core training 1 (CT1) and core training 2 (CT2) stages of medical training. CT2 trainees had a median GIR of 2, whereas CT1 and FY2 trainees both had higher GIR of 3.

### Independent-Samples Kruskal-Wallis Test Summary

|                               |                      |
|-------------------------------|----------------------|
| Total N                       | 100                  |
| Test Statistic                | 1.657 <sup>a,b</sup> |
| Degree Of Freedom             | 2                    |
| Asymptotic Sig.(2-sided test) | .437                 |

- a. The test statistic is adjusted for ties.
- b. Multiple comparisons are not performed because the overall test does not show significant differences across samples.

Table 1.2. Table showing insignificant results of Kruskal Wallis Significance Test on median gender impact rating for pre- and post-core training, showing an asymptotic significance (p-value) of 0.437 which was not significant ( $\alpha = 0.05$ ).

| Ethnicity                        | Median Gender Impact Rating |
|----------------------------------|-----------------------------|
| White British/Irish/Other        | 2                           |
| Black, Asian and Minority Ethnic | 3                           |

Table 2.1. A comparison of the Gender Impact Rating (GIR) between White/British/Other participants and Black, Asian and Minority Ethnic (BAME) participants. GIR of White/British/Other participants skewed towards lower values with the median rating of 2 which is lower than the BAME median of 3. Difference in GIR of BAME and White/British/Other respondents was not statistically significant.

### Independent-Samples Kruskal-Wallis Test Summary

|                               |                      |
|-------------------------------|----------------------|
| Total N                       | 97                   |
| Test Statistic                | 3.025 <sup>a,b</sup> |
| Degree Of Freedom             | 1                    |
| Asymptotic Sig.(2-sided test) | .082                 |

- a. The test statistic is adjusted for ties.
- b. Multiple comparisons are not performed because the overall test does not show significant differences across samples.

Table 2.2. Table showing insignificant results from Kruskal-Wallis Test on Gender Impact Ratings of Black, Asian Minority Ethnic and White/British/Other respondents, showing an asymptotic significance (p-value) of 0.082 which was not significant ( $\alpha = 0.05$ ).

### Top ranked motivator \* Marital status Crosstabulation

| Top ranked motivator                           |  | Marital status  |               |                           |               | Total     |               |
|------------------------------------------------|--|-----------------|---------------|---------------------------|---------------|-----------|---------------|
|                                                |  | Unmarried       |               | Married/Civil Partnership |               | N         | %             |
|                                                |  | N               | %             | N                         | %             |           |               |
| Professional support in the specialties        |  | 15 <sup>a</sup> | 19.2%         | 11 <sup>b</sup>           | 57.9%         | 26        | 26.8%         |
| Social support system                          |  | 10 <sup>a</sup> | 12.8%         | 1 <sup>a</sup>            | 5.3%          | 11        | 11.3%         |
| Positive changes to the organisational culture |  | 4 <sup>a</sup>  | 5.1%          | 0 <sup>a</sup>            | 0.0%          | 4         | 4.1%          |
| Early exposure to surgical specialties         |  | 37 <sup>a</sup> | 47.4%         | 7 <sup>a</sup>            | 36.8%         | 44        | 45.4%         |
| Income                                         |  | 1 <sup>a</sup>  | 1.3%          | 0 <sup>a</sup>            | 0.0%          | 1         | 1.0%          |
| Career progression is well defined             |  | 11 <sup>a</sup> | 14.1%         | 0 <sup>a</sup>            | 0.0%          | 11        | 11.3%         |
| <b>Total</b>                                   |  | <b>78</b>       | <b>100.0%</b> | <b>19</b>                 | <b>100.0%</b> | <b>97</b> | <b>100.0%</b> |

Each subscript letter denotes a subset of Marital status categories whose column proportions do not differ significantly from each other at the .05 level.

Table 3.1. Cross Tabulation of top ranked motivators against married and unmarried participants showing the significant ( $\alpha = 0.05$ ) difference in the proportion of top ranking professional support between married and unmarried individuals.

**Chi-Square Tests**

|                              | Value               | df | Asymptotic Significance (2-sided) |
|------------------------------|---------------------|----|-----------------------------------|
| Pearson Chi-Square           | 13.566 <sup>a</sup> | 5  | .019                              |
| Likelihood Ratio             | 15.273              | 5  | .009                              |
| Linear-by-Linear Association | 8.870               | 1  | .003                              |
| N of Valid Cases             | 97                  |    |                                   |

a. 6 cells (50.0%) have expected count less than 5. The minimum expected count is .20.

Table 3.2. Results of Pearson's Chi-Square test of the most influential motivators against marital status showing a significant difference between the two groups ( $p=0.019$ ).
